# Supplementary material for: CellNOptR: a flexible toolkit to train protein signaling networks to data using multiple logic formalisms
Source: Springer Nature journal article supplement (doi:10.1186/1752-0509-6-133), 2012-10-18
Supplement: 12918_2012_1057_MOESM1_ESM.pdf [file 12918_2012_1057_MOESM1_ESM.pdf]

|              |                                                                                                                                                                                                                                                                                             |
|--------------|---------------------------------------------------------------------------------------------------------------------------------------------------------------------------------------------------------------------------------------------------------------------------------------------|
| Measurements | AKT1/AKT2/AKT3 (akt)<br>MK01/MK03 (erk1/erk2)<br>GSK3A/GSK3B<br>IKBA<br>JNK1/2 (MK08/MK09)<br>MK11/MK12/MK13/MK14 (p38)<br>KS6B1 (p70s6)<br>KS6B1 (p90rsk)<br>STAT3<br>JUN<br>CREB1/ATF4/CREB3/CREB5 (creb)<br>H31T/H33 (histH3)<br>HSPB1 (hsp27)<br>IRS1<br>MP2K2/MP2K1 (mek1/mek2)<br>P53 |
| Stimuli      | IFNG<br>TNFA<br>IL1A<br>IL6<br>IGF1<br>TGFA<br>lps                                                                                                                                                                                                                                          |
| Inhibitors   | MP2K2/MP2K1 (mek1/mek2)<br>MK11/MK12/MK13/MK14 (p38)<br>PK3CA/PK3CB/PK3CG/P85A/P85B/P55G/PI3R4/PI3R5/PI3R6 (pi3k)<br>MTOR<br>GSK3A/GSK3B<br>MK08/MK09<br>IKKA/IKKB/NEMO (ikk)                                                                                                               |
