# Supplementary material for: CellNOptR: a flexible toolkit to train protein signaling networks to data using multiple logic formalisms
Source: Springer Nature journal article supplement (doi:10.1186/1752-0509-6-133), 2012-10-18

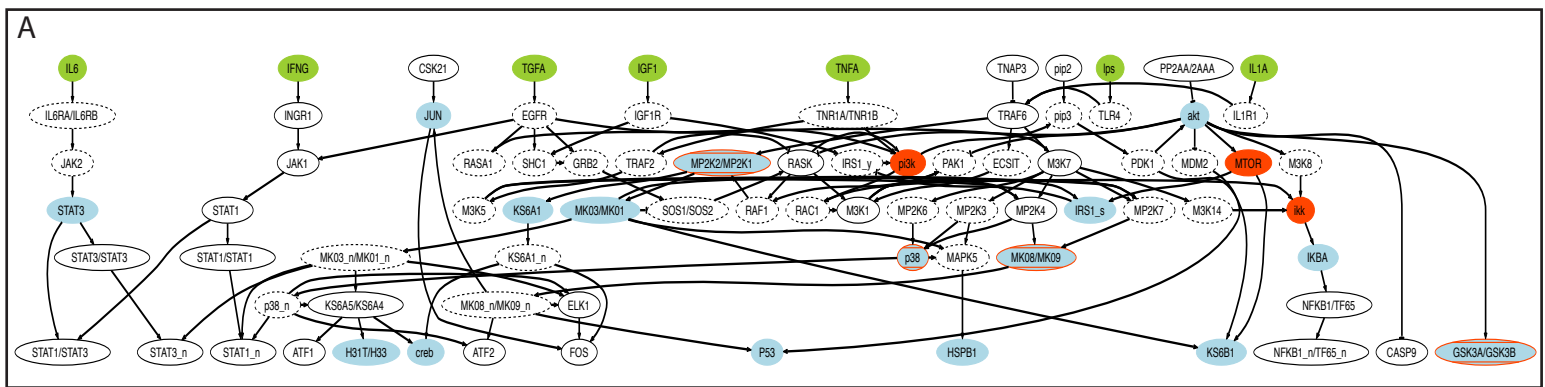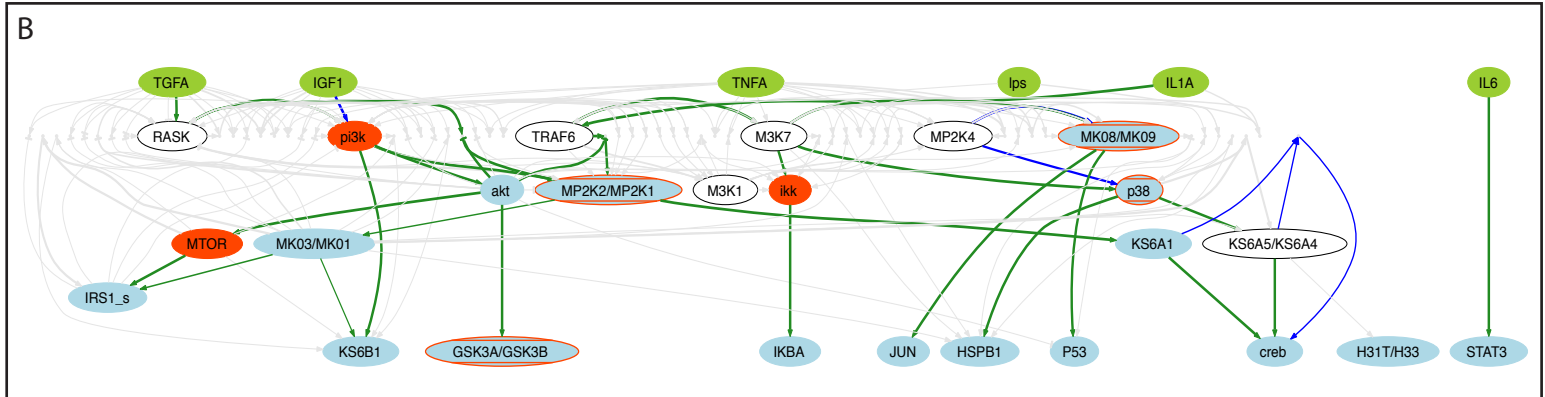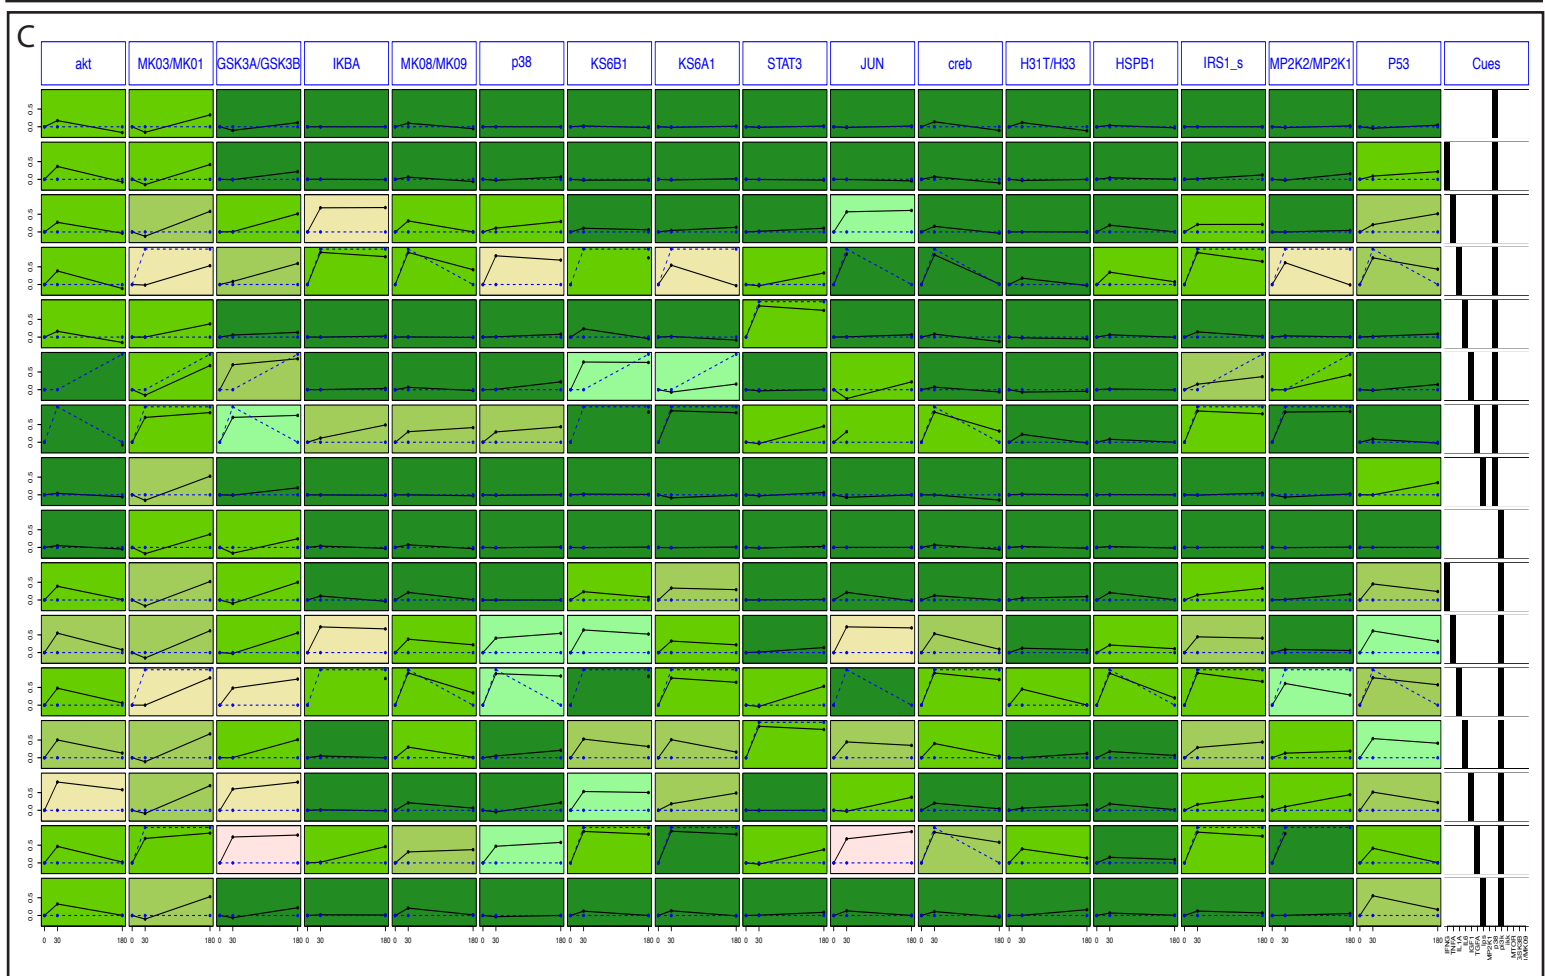

Supplement: 12918_2012_1057_MOESM4_ESM.pdf [file 12918_2012_1057_MOESM4_ESM.pdf]
