# Supplementary material for: CellNOptR: a flexible toolkit to train protein signaling networks to data using multiple logic formalisms
Source: Springer Nature journal article supplement (doi:10.1186/1752-0509-6-133), 2012-10-18

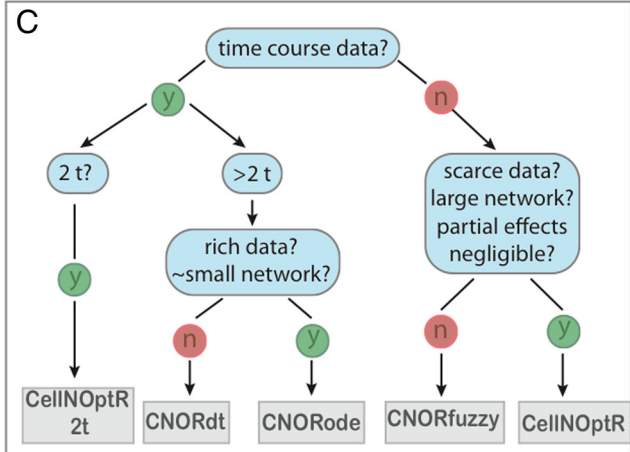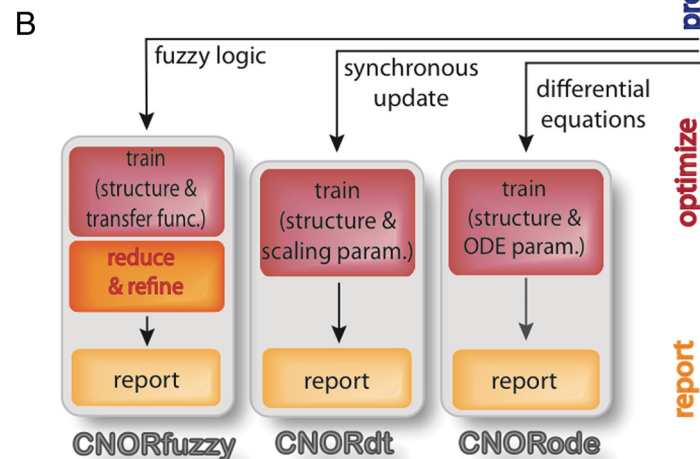

|       |              |             |            |                       |
|-------|--------------|-------------|------------|-----------------------|
| TIME  | steady-state | time course | continuous | steady-state (1 or 2) |
| STATE | continuous   | Boolean     | continuous | Boolean               |

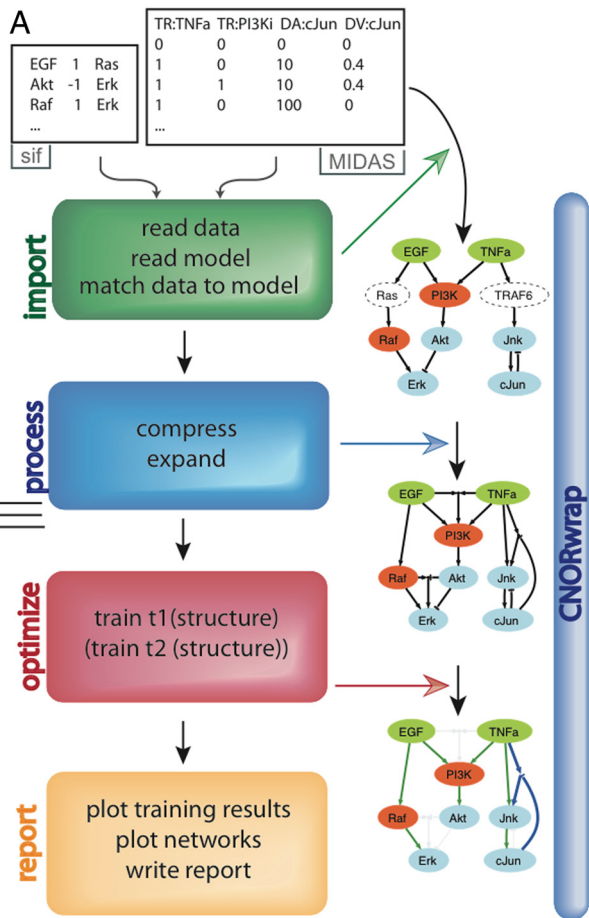

Supplement: 12918_2012_1057_MOESM6_ESM.pdf [file 12918_2012_1057_MOESM6_ESM.pdf]
