# Supplementary material for: CellNOptR: a flexible toolkit to train protein signaling networks to data using multiple logic formalisms
Source: Springer Nature journal article supplement (doi:10.1186/1752-0509-6-133), 2012-10-18

| MP2K2/MP2K1 | p38 | creb $\tau_1$ | creb $\tau_2$ |
|-------------|-----|---------------|---------------|
| 0           | 0   | 0             | 0             |
| 0           | 1   | 1             | 0             |
| 1           | 0   | 1             | 0             |
| 1           | 1   | 1             | 1             |

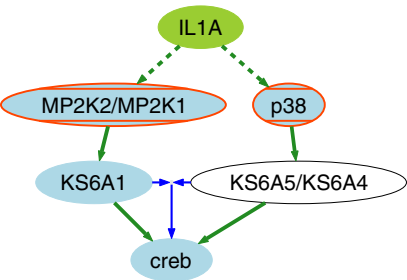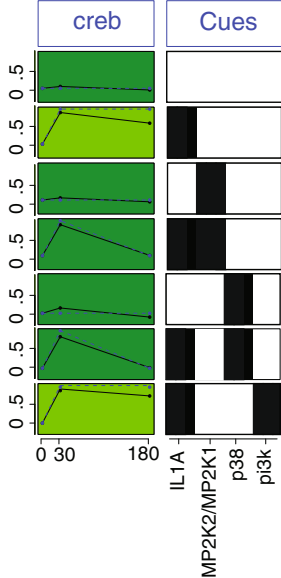

Supplement: 12918_2012_1057_MOESM8_ESM.pdf [file 12918_2012_1057_MOESM8_ESM.pdf]
