# Supplementary material for: CellNOptR: a flexible toolkit to train protein signaling networks to data using multiple logic formalisms
Source: Springer Nature journal article supplement (doi:10.1186/1752-0509-6-133), 2012-10-18
Supplement: 12918_2012_1057_MOESM9_ESM.pdf [file 12918_2012_1057_MOESM9_ESM.pdf]

Control Panel

Network

| Network          | Nodes | Edges |
|------------------|-------|-------|
| ToyModeler       | 30(0) | 33(0) |
| Example_PKN      | 30(0) | 33(0) |
| Example_Scaffold | 17(0) | 30(0) |

Example\_PKN

Example\_Scaffold

CytoCopteR - CellNOptR in Cytoscape

CytoCopteR run configuration wizard

Simulation plot | Fitness plot | Data plot | Configurations

|      | raf1 | erk | ap1 | gsk3 | p38 | nikk | Cues |
|------|------|-----|-----|------|-----|------|------|
| 0.0  | 0.0  | 0.0 | 0.0 | 0.0  | 0.0 | 0.0  | 0.0  |
| 0.25 | 0.0  | 0.0 | 0.0 | 0.0  | 0.0 | 0.0  | 0.0  |
| 0.5  | 0.0  | 0.0 | 0.0 | 0.0  | 0.0 | 0.0  | 0.0  |
| 0.75 | 0.0  | 0.0 | 0.0 | 0.0  | 0.0 | 0.0  | 0.0  |
| 1.0  | 0.0  | 0.0 | 0.0 | 0.0  | 0.0 | 0.0  | 0.0  |
| 1.25 | 0.0  | 0.0 | 0.0 | 0.0  | 0.0 | 0.0  | 0.0  |
| 1.5  | 0.0  | 0.0 | 0.0 | 0.0  | 0.0 | 0.0  | 0.0  |
| 1.75 | 0.0  | 0.0 | 0.0 | 0.0  | 0.0 | 0.0  | 0.0  |
| 2.0  | 0.0  | 0.0 | 0.0 | 0.0  | 0.0 | 0.0  | 0.0  |
| 2.25 | 0.0  | 0.0 | 0.0 | 0.0  | 0.0 | 0.0  | 0.0  |
| 2.5  | 0.0  | 0.0 | 0.0 | 0.0  | 0.0 | 0.0  | 0.0  |
| 2.75 | 0.0  | 0.0 | 0.0 | 0.0  | 0.0 | 0.0  | 0.0  |
| 3.0  | 0.0  | 0.0 | 0.0 | 0.0  | 0.0 | 0.0  | 0.0  |
| 3.25 | 0.0  | 0.0 | 0.0 | 0.0  | 0.0 | 0.0  | 0.0  |
| 3.5  | 0.0  | 0.0 | 0.0 | 0.0  | 0.0 | 0.0  | 0.0  |
| 3.75 | 0.0  | 0.0 | 0.0 | 0.0  | 0.0 | 0.0  | 0.0  |
| 4.0  | 0.0  | 0.0 | 0.0 | 0.0  | 0.0 | 0.0  | 0.0  |
| 4.25 | 0.0  | 0.0 | 0.0 | 0.0  | 0.0 | 0.0  | 0.0  |
| 4.5  | 0.0  | 0.0 | 0.0 | 0.0  | 0.0 | 0.0  | 0.0  |
| 4.75 | 0.0  | 0.0 | 0.0 | 0.0  | 0.0 | 0.0  | 0.0  |
| 5.0  | 0.0  | 0.0 | 0.0 | 0.0  | 0.0 | 0.0  | 0.0  |
| 5.25 | 0.0  | 0.0 | 0.0 | 0.0  | 0.0 | 0.0  | 0.0  |
| 5.5  | 0.0  | 0.0 | 0.0 | 0.0  | 0.0 | 0.0  | 0.0  |
| 5.75 | 0.0  | 0.0 | 0.0 | 0.0  | 0.0 | 0.0  | 0.0  |
| 6.0  | 0.0  | 0.0 | 0.0 | 0.0  | 0.0 | 0.0  | 0.0  |
| 6.25 | 0.0  | 0.0 | 0.0 | 0.0  | 0.0 | 0.0  | 0.0  |
| 6.5  | 0.0  | 0.0 | 0.0 | 0.0  | 0.0 | 0.0  | 0.0  |
| 6.75 | 0.0  | 0.0 | 0.0 | 0.0  | 0.0 | 0.0  | 0.0  |
| 7.0  | 0.0  | 0.0 | 0.0 | 0.0  | 0.0 | 0.0  | 0.0  |
| 7.25 | 0.0  | 0.0 | 0.0 | 0.0  | 0.0 | 0.0  | 0.0  |
| 7.5  | 0.0  | 0.0 | 0.0 | 0.0  | 0.0 | 0.0  | 0.0  |
| 7.75 | 0.0  | 0.0 | 0.0 | 0.0  | 0.0 | 0.0  | 0.0  |
| 8.0  | 0.0  | 0.0 | 0.0 | 0.0  | 0.0 | 0.0  | 0.0  |
| 8.25 | 0.0  | 0.0 | 0.0 | 0.0  | 0.0 | 0.0  | 0.0  |
| 8.5  | 0.0  | 0.0 | 0.0 | 0.0  | 0.0 | 0.0  | 0.0  |
| 8.75 | 0.0  | 0.0 | 0.0 | 0.0  | 0.0 | 0.0  | 0.0  |
| 9.0  | 0.0  | 0.0 | 0.0 | 0.0  | 0.0 | 0.0  | 0.0  |
| 9.25 | 0.0  | 0.0 | 0.0 | 0.0  | 0.0 | 0.0  | 0.0  |
| 9.5  | 0.0  | 0.0 | 0.0 | 0.0  | 0.0 | 0.0  | 0.0  |
| 9.75 | 0.0  | 0.0 | 0.0 | 0.0  | 0.0 | 0.0  | 0.0  |
| 10.0 | 0.0  | 0.0 | 0.0 | 0.0  | 0.0 | 0.0  | 0.0  |

CytoCopteR - CellNOptR in Cytoscape

GA parameters

- Size scaling factor
- NA scaling factor
- Population size
- Mutation probability
- Maximum optimisation time
- Maximum number of generations
- Maximum number of stall generations
- Selective pressure
- Elitism
- Relative tolerance

Size fac: 1.0E-4      Max gens: 500.0

Na fac: 1.0      Stall gen max: 100.0

Pop size: 50.0      Sel press: 1.2

P mutation: 50.0      Elitism: 5.0

Max time: 30.0      Rel tol: 0.1

Maximum number of generations in the genetic algorithm, default set to 500

Back   Next   Cancel

CytoCopteR run:

Load...   Save...

Back   Finish   Cancel
