# Supplementary material for: CellNOptR: a flexible toolkit to train protein signaling networks to data using multiple logic formalisms
Source: Springer Nature journal article supplement (doi:10.1186/1752-0509-6-133), 2012-10-18
Supplement: 12918_2012_1057_MOESM10_ESM.pdf [file 12918_2012_1057_MOESM10_ESM.pdf]

# TIME RESOLUTION

# STATE RESOLUTION

|             | steady state               | discrete                                                      | continuous                       |
|-------------|----------------------------|---------------------------------------------------------------|----------------------------------|
| binary      | <b>CellNOptR</b>           | BooleanNet<br>BoolNet<br>ChemChains<br><b>CNORdt</b><br>Odefy | BooleanNet                       |
| multi-state | CellNetAnalyzer<br>MetaReg | GinSim                                                        | Genetic<br>Network<br>Analyzer   |
| continuous  | <b>CNORfuzzy</b>           |                                                               | <b>CNORode</b><br>Odefy<br>SQUAD |
